# Supplementary material
Source: publisher figshare collection journal article supplement (https://frontiersin.figshare.com/ndownloader/files/13245638)
Supplement: Supplementary file [file 13245638]

# Supplementary Table 1

## ELEVATED AUTOANTIBODIES IN SUBACUTE HUMAN SPINAL CORD INJURY ARE NATURALLY OCCURRING ANTIBODIES

Angel Arevalo-Martin\*, Lukas Grassner, Daniel Garcia-Ovejero, Beatriz Paniagua-Torija, Gemma Barroso-Garcia, Alba Gonzalez-Arandilla, Orpheus Mach, Angela Turrero, Eduardo Vargas, Monica Alcobendas, Carmen Rosell, Maria A. Alcaraz, Silvia Ceruelo, Rosa Casado, Francisco Talavera, Ramiro Palazón, Nuria Sanchez-Blanco, Doris Maier, Ana Esclarin, Eduardo Molina-Holgado.

\* Correspondence: aarevalom@sescam.jccm.es

Suppl. Table 1: Characteristics of spinal cord tissue samples employed for proteomics studies

| Code     | Diagnostic <sup>a</sup>   | Gender | Age | Spinal cord level  | PMD <sup>b</sup> (h:m) |
|----------|---------------------------|--------|-----|--------------------|------------------------|
| BCPA364M | No SC pathology           | M      | 43  | cervical           | Unknown                |
| BCPA188M | No SC pathology           | M      | 46  | cervical           | Unknown                |
| BCPA236M | No SC pathology           | F      | 52  | cervical           | Unknown                |
| CS1113   | No SC pathology           | M      | 85  | thoracic           | 8:15                   |
| BCPA295M | ALS                       | F      | 59  | thoracic           | Unknown                |
| BCPA325M | ALS                       | F      | 56  | thoracic           | Unknown                |
| CS1036   | ALS                       | M      | 38  | thoracic           | 7:00                   |
| CS946    | ALS + ARP III             | F      | 84  | lumbar             | 5:00                   |
| CS840    | MS                        | M      | 68  | thoracic           | 7:00                   |
| CS921    | MS                        | F      | 52  | lumbar             | 3:30                   |
| CS1598   | Balo concentric sclerosis | M      | 32  | cervical/ thoracic | 10:00                  |

<sup>a</sup> SC: spinal cord; ALS: amyotrophic lateral sclerosis; ARP III: Alzheimer's disease related pathology, Braak stage III; MS: multiple sclerosis.

<sup>b</sup> PMD: Postmortem delay (in hours:minutes)
